# Supplementary material for: Intensive West Nile Virus Circulation in Serbia in 2018—Results of Integrated Surveillance Program
Source: MDPI journal article supplement (doi:10.3390/pathogens10101294), 2021-10-08
Supplement: s1 [file s1]

**Table S1: Description of the sampling locations: Districts names, geographic coordinates and web links**

| Districts (NUTS3)* |                  | Geographic coordinates<br>(the center of the district) | Web links for basic decription of the Districts                                                                               |
|--------------------|------------------|--------------------------------------------------------|-------------------------------------------------------------------------------------------------------------------------------|
| Vojvodina Province | Central Banat    | 45.4788° N, 20.6083° E                                 | <a href="https://en.wikipedia.org/wiki/Central_Banat_District">https://en.wikipedia.org/wiki/Central_Banat_District</a>       |
|                    | North Bačka      | 45.9803° N, 19.5907° E                                 | <a href="https://en.wikipedia.org/wiki/North_Ba%C4%8Dka_District">https://en.wikipedia.org/wiki/North_Ba%C4%8Dka_District</a> |
|                    | North Banat      | 45.9068° N, 19.9993° E                                 | <a href="https://en.wikipedia.org/wiki/North_Banat_District">https://en.wikipedia.org/wiki/North_Banat_District</a>           |
|                    | South Bačka      | 45.4890° N, 19.6976° E                                 | <a href="https://en.wikipedia.org/wiki/South_Ba%C4%8Dka_District">https://en.wikipedia.org/wiki/South_Ba%C4%8Dka_District</a> |
|                    | South Banat      | 45.0027° N, 21.0543° E                                 | <a href="https://en.wikipedia.org/wiki/South_Banat_District">https://en.wikipedia.org/wiki/South_Banat_District</a>           |
|                    | Srem             | 45.0029° N, 19.8014° E                                 | <a href="https://en.wikipedia.org/wiki/Srem_District">https://en.wikipedia.org/wiki/Srem_District</a>                         |
|                    | West Bačka       | 45.7355° N, 19.1897° E                                 | <a href="https://en.wikipedia.org/wiki/West_Ba%C4%8Dka_District">https://en.wikipedia.org/wiki/West_Ba%C4%8Dka_District</a>   |
| Central Serbia     | City of Belgrade | 44.5850° N, 20.3964° E                                 | <a href="https://en.wikipedia.org/wiki/Belgrade">https://en.wikipedia.org/wiki/Belgrade</a>                                   |
|                    | Bor              | 44.3702° N, 22.2857° E                                 | <a href="https://en.wikipedia.org/wiki/Bor_District">https://en.wikipedia.org/wiki/Bor_District</a>                           |
|                    | Braničevo        | 44.5298° N, 21.4910° E                                 | <a href="https://en.wikipedia.org/wiki/Brani%C4%8Devo_District">https://en.wikipedia.org/wiki/Brani%C4%8Devo_District</a>     |
|                    | Jablanica        | 42.9482° N, 21.8129° E                                 | <a href="https://en.wikipedia.org/wiki/Jablanica_District">https://en.wikipedia.org/wiki/Jablanica_District</a>               |
|                    | Kolubara         | 44.3510° N, 20.0004° E                                 | <a href="https://en.wikipedia.org/wiki/Kolubara_District">https://en.wikipedia.org/wiki/Kolubara_District</a>                 |
|                    | Mačva            | 44.5925° N, 19.5082° E                                 | <a href="https://en.wikipedia.org/wiki/Ma%C4%8Dva_District">https://en.wikipedia.org/wiki/Ma%C4%8Dva_District</a>             |
|                    | Moravica         | 43.8415° N, 20.2905° E                                 | <a href="https://en.wikipedia.org/wiki/Moravica_District">https://en.wikipedia.org/wiki/Moravica_District</a>                 |
|                    | Nišava           | 43.3739° N, 21.9322° E                                 | <a href="https://en.wikipedia.org/wiki/Ni%C5%A1ava_District">https://en.wikipedia.org/wiki/Ni%C5%A1ava_District</a>           |
|                    | Pčinja           | 42.5836° N, 22.1430° E                                 | <a href="https://en.wikipedia.org/wiki/P%C4%8Dinja_District">https://en.wikipedia.org/wiki/P%C4%8Dinja_District</a>           |
|                    | Pirot            | 43.0874° N, 22.5983° E                                 | <a href="https://en.wikipedia.org/wiki/Pirot_District">https://en.wikipedia.org/wiki/Pirot_District</a>                       |
|                    | Podunavlje       | 44.4729° N, 20.9901° E                                 | <a href="https://en.wikipedia.org/wiki/Podunavlje_District">https://en.wikipedia.org/wiki/Podunavlje_District</a>             |
|                    | Pomoravlje       | 43.9591° N, 21.2714° E                                 | <a href="https://en.wikipedia.org/wiki/Pomoravlje_District">https://en.wikipedia.org/wiki/Pomoravlje_District</a>             |
|                    | Rasina           | 43.5264° N, 21.1588° E                                 | <a href="https://en.wikipedia.org/wiki/Rasina_District">https://en.wikipedia.org/wiki/Rasina_District</a>                     |
|                    | Raška            | 43.3373° N, 20.5734° E                                 | <a href="https://en.wikipedia.org/wiki/Ra%C5%A1ka_District">https://en.wikipedia.org/wiki/Ra%C5%A1ka_District</a>             |
|                    | Šumadija         | 44.2051° N, 20.7857° E                                 | <a href="https://en.wikipedia.org/wiki/%C5%A0umadija_District">https://en.wikipedia.org/wiki/%C5%A0umadija_District</a>       |
|                    | Toplica          | 43.1907° N, 21.3408° E                                 | <a href="https://en.wikipedia.org/wiki/Toplica_District">https://en.wikipedia.org/wiki/Toplica_District</a>                   |
|                    | Zaječar          | 43.8039° N, 22.0538° E                                 | <a href="https://en.wikipedia.org/wiki/Zaje%C4%8Dar_District">https://en.wikipedia.org/wiki/Zaje%C4%8Dar_District</a>         |
|                    | Zlatibor         | 43.6454° N, 19.7101° E                                 | <a href="https://en.wikipedia.org/wiki/Zlatibor_District">https://en.wikipedia.org/wiki/Zlatibor_District</a>                 |
